# Supplementary material
Source: publisher site journal article supplement (https://www.spandidos-publications.com/4820/downloadSupplementary)

Figure S1. miR-20b-5p expression levels in PCa patients with different clinicopathological parameters. miR-20b-5p expression levels in patients with PCa in The Cancer Genome Atlas cohort were compared according to (A) age, (B) race, (C) Gleason score, (D) ISUP grade, (E) tumor stage, (F) node stage, (G) metastasis stage, (H) radiation, (I) cancer subtype and (J) survival status of the patients. ISUP, International Society of Urological Pathology; miR, microRNA; PCa, prostate cancer.

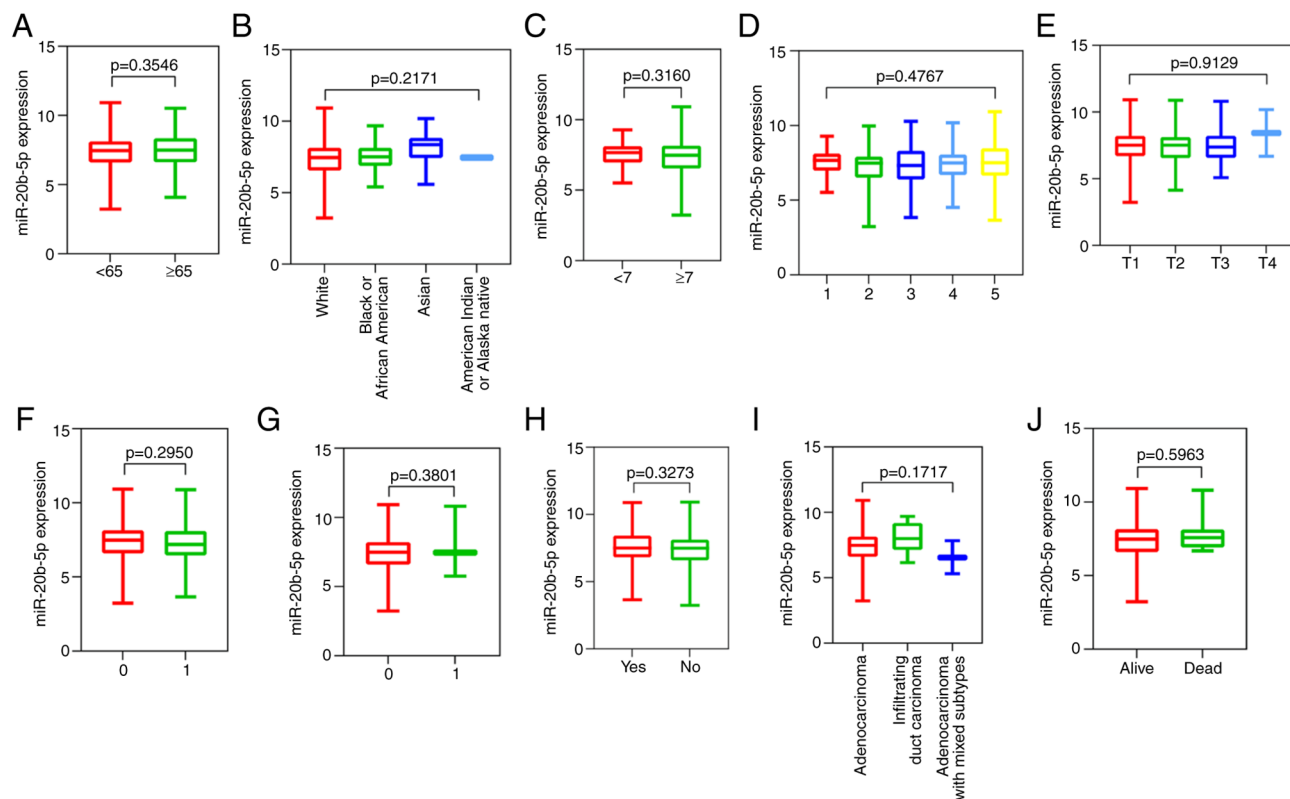

Supplement: Supplementary file 1 [file downloadSupplementary]
